# Supplementary material for: Modelling the Unidentified Abortion Burden from Four Infectious Pathogenic Microorganisms (Leptospira interrogans, Brucella abortus, Brucella ovis, and Chlamydia abortus) in Ewes Based on Artificial Neural Networks Approach: The Epidemiological Basis for a Control Policy
Source: MDPI journal article supplement (doi:10.3390/ani13182955), 2023-09-18
Supplement: s1 [file s1]

**Table S2.** The geographic distribution of clustered sampling and group size in sheep transhumance systems.

| Clusters <sup>&amp;</sup> | Municipalities         | Number of animals | Sampled animals | Cumulative percentage | Geographical coordinates |                   |                 |
|---------------------------|------------------------|-------------------|-----------------|-----------------------|--------------------------|-------------------|-----------------|
|                           |                        |                   |                 |                       | Northern latitude        | Western longitude | Altitude (masl) |
| 1                         | Lerma                  | 34                | 3               | .9                    | 19°18'41''               | 99°26'23''        | 2574            |
| 2                         | Ocoyoacac              | 22                | 7               | 2.9                   | 19°17'05''               | 99°26'34''        | 2731.2          |
| 3                         | Ocoyoacac              | 206               | 8               | 5.2                   | 19°16'30''               | 99°29'11''        | 2735            |
| 4                         | Capulhuac              | 160               | 8               | 7.5                   | 19°14'54''               | 99°27'15''        | 2735.22         |
| 5                         | Lerma                  | 154               | 9               | 10.1                  | 19°14'19''               | 99°28'53''        | 2866            |
| 6                         | Lerma                  | 51                | 6               | 11.9                  | 19°14'16''               | 99°28'52''        | 2572            |
| 7                         | Lerma                  | 182               | 12              | 15.4                  | 19°14'16''               | 99°28'42''        | 2574            |
| 8                         | Capulhuac              | 76                | 18              | 20.6                  | 19°13'18''               | 99°27'22''        | 2735.05         |
| 9                         | Chapultepec            | 176               | 7               | 22.6                  | 19°12'01''               | 99°31'21''        | 2574.32         |
| 10                        | Chapultepec            | 145               | 6               | 24.3                  | 19°12'02''               | 99°31'21''        | 2574.27         |
| 11                        | Santiago Tianguistenco | 295               | 10              | 27.2                  | 19°12'03''               | 99°31'21''        | 2574.26         |
| 12                        | Chapultepec            | 120               | 16              | 31.9                  | 19°12'04''               | 99°31'21''        | 2574.24         |
| 13                        | Santiago Tianguistenco | 94                | 5               | 33.3                  | 19°12'05''               | 99°31'21''        | 2574.26         |
| 14                        | Santiago Tianguistenco | 111               | 7               | 35.4                  | 19°12'06''               | 99°31'21''        | 2574.27         |
| 15                        | Santiago Tianguistenco | 107               | 13              | 39.1                  | 19°12'10''               | 99°25'48''        | 2735.12         |
| 16                        | Capulhuac              | 120               | 10              | 42                    | 19°12'26''               | 99°28'18''        | 2735.1          |
| 17                        | Santiago Tianguistenco | 48                | 10              | 44.9                  | 19°12'11''               | 99°31'33''        | 2575.12         |
| 18                        | Chapultepec            | 60                | 10              | 47.8                  | 19°12'12''               | 99°31'37''        | 2575.16         |
| 19                        | Chapultepec            | 150               | 15              | 52.2                  | 19°12'13''               | 99°31'37''        | 2575.11         |
| 20                        | Santiago Tianguistenco | 140               | 10              | 55.1                  | 19°11'55''               | 99°31'21''        | 2574.31         |
| 21                        | Santiago Tianguistenco | 298               | 24              | 62                    | 19°11'56''               | 99°31'21''        | 2574.34         |
| 22                        | Xalatlaco              | 130               | 17              | 67                    | 19°10'47''               | 99°24'25''        | 2817            |
| 23                        | Xalatlaco              | 200               | 12              | 70.4                  | 19°10'08''               | 99°25'13''        | 2827            |
| 24                        | Xalatlaco              | 76                | 7               | 72.5                  | 19°10'03''               | 99°25'02''        | 2811            |
| 25                        | Xalatlaco              | 18                | 10              | 75.4                  | 19°10'01''               | 99°25'08''        | 2952            |
| 26                        | Xalatlaco              | 35                | 8               | 77.7                  | 19°09'48''               | 99°23'01''        | 2995            |
| 27                        | Xalatlaco              | 121               | 8               | 80                    | 19°09'40''               | 99°24'15''        | 2831            |
| 28                        | Xalatlaco              | 130               | 24              | 87                    | 19°09'20''               | 99°24'27''        | 2829            |

|    |             |     |    |      |            |            |         |
|----|-------------|-----|----|------|------------|------------|---------|
| 29 | Tescalyacac | 130 | 10 | 89.9 | 19°08'12'' | 99°30'56'' | 2574.3  |
| 30 | Tescalyacac | 46  | 7  | 91.9 | 19°08'13'' | 99°30'56'' | 2574.3  |
| 31 | Tescalyacac | 51  | 9  | 94.5 | 19°08'14'' | 99°30'58'' | 2574.29 |
| 32 | Tescalyacac | 117 | 10 | 97.4 | 19°08'24'' | 99°31'06'' | 2574.29 |
| 33 | Tescalyacac | 59  | 3  | 98.3 | 19°08'27'' | 99°31'25'' | 2574.29 |
| 34 | Tescalyacac | 20  | 4  | 99.4 | 19°08'29'' | 99°30'48'' | 2574.29 |
| 35 | Tescalyacac | 10  | 2  | 100  | 19°08'34'' | 99°30'58'' | 2574.29 |

&The numbering of the clusters does not correspond to the order of sampling selection.

masl., meters above sea level.
