# Supplementary material for: Modelling the Unidentified Abortion Burden from Four Infectious Pathogenic Microorganisms (Leptospira interrogans, Brucella abortus, Brucella ovis, and Chlamydia abortus) in Ewes Based on Artificial Neural Networks Approach: The Epidemiological Basis for a Control Policy
Source: MDPI journal article supplement (doi:10.3390/ani13182955), 2023-09-18
Supplement: s1 [file s1]

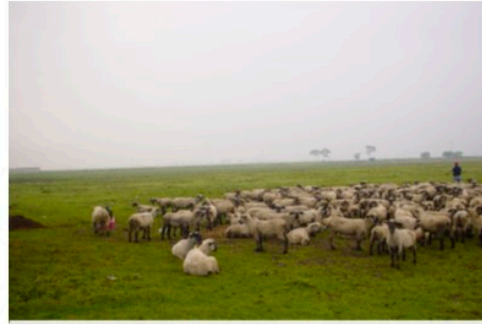

(a)

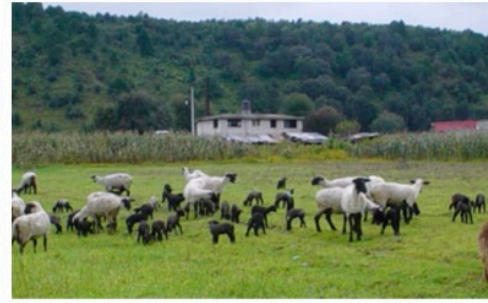

(b)

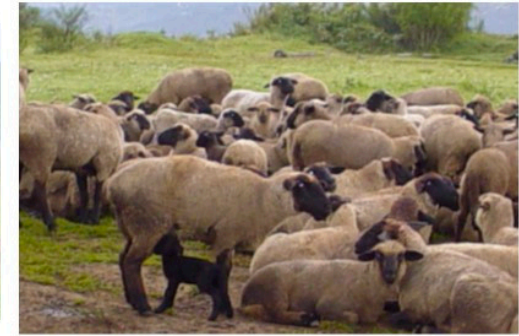

(c)

**Figure S1.** The view of the flocks of sheep in their habitats where they have shelter, water, and a large grassy pasture. (a) zone 1 (elevations up to 2600 masl.); (b) zone 2 (2601 to 2800 masl.); and (c) zone 3 (>2800 masl.).
