# Supplementary material for: Modelling the Unidentified Abortion Burden from Four Infectious Pathogenic Microorganisms (Leptospira interrogans, Brucella abortus, Brucella ovis, and Chlamydia abortus) in Ewes Based on Artificial Neural Networks Approach: The Epidemiological Basis for a Control Policy
Source: MDPI journal article supplement (doi:10.3390/ani13182955), 2023-09-18
Supplement: s1 [file s1]

**Table S4.** Questionnaire to collect information about the flocks, animals, and risks factors related to ewes' abortion.

This form lists a few questions about infectious diseases and some risk factors which be associated with abortion. We place a mark only one in the appropriate box.

#### 1. SHEEP FLOCK DATA:

Owner's name: \_\_\_\_\_

Municipality: ☐ Calpulhuac ☐ Ocoyoacac ☐ Texcalyacac ☐ Chapultepec ☐ Santiago-Tianguistenco ☐ Xalatlaco.

Sheep breed: ☐ Peligüey ☐ Hampshire ☐ Suffolk ☐ Suffolk-Peligüey crossbreed ☐ Hampshire-Pelibuey crossbreed.

What do you raise sheep for? ☐ Market ☐ Breeding program

Did you make additions to the sheep flock in the last 6 months? ☐ No ☐ Yes.

Where was this sheep purchased? ☐ Rural market ☐ Imported animals ☐ Born in flock.

Place of lambing: ☐ Pasture lambing ☐ Shed lambing.

Grazing time: ☐ Permanent ☐ Occasional.

What type of pasture does sheep eat when they are mobilized from one place to another?

☐ Alpine herbage ☐ Stalks of maize ☐ Stalks of oats.

How many animals do you move? \_\_\_\_\_

The water supply for the animals is: ☐ Drinking water ☐ Lake ☐ Irrigation canals.

#### 2. SHEEP YARD DESIGN AND CONSTRUCTION:

Geographic location of the animal groups: Coordinates of longitude \_\_\_\_\_, and altitude \_\_\_\_\_ of the position. Time \_\_\_\_\_ Satellites \_\_\_\_\_

Holding area (m<sup>2</sup>): \_\_\_\_\_ Number of animals in paddock: \_\_\_\_\_

Number of animals housed at night: \_\_\_\_\_

What are the materials you use to build your sheep pen? ☐ Bricks ☐ Metal sheets and untreated wood.

Sheep pen flooring: ☐ Dirt pen flooring only ☐ Dirt and concrete pen flooring

Drainage in sheep pen: ☐ No ☐ Yes.

#### 3. HEALTH AND MANAGEMENT:

Ewe gave birth on a bed of straw? ☐ No ☐ Yes

Where was born the lamb of this ewe? ☐ Birthing pen ☐ Meadow.

Cleaning of bedding: ☐ No ☐ Yes.

What is the cleaning frequency of sheep housing? ☐ Never ☐ Twice a week.

What handling of excreta do you carry out in the housing pen? ☐ The excreta stay spread out on the meadow ☐ Agglomeration of excreta near the housing pen.

Removal of aborted fetuses and fetal membranes from meadows: ☐ No ☐ Yes.

Do you use wear gloves or masks to prevent the transmission of microorganisms?

☐ No ☐ Yes.

When a storm comes, what do you do to avoid animals from panicking? ☐ Congregate in a place, only. ☐ Congregate to avoid panic and give forage with vitamin and mineral supplements.

Do you set traps to capture rodents or other wildlife? ☐ No ☐ Yes.

#### 4. CLINICAL FEATURES

This checklist is designed for use in each one selected animal. Please, mark with "0= No" or "1=Yes" in the appropriate box.

| No. | Abortion/Stillbirth, jaundiced/Haemorrhagic fetus | Haemoglobinuria | Jaundice | Haemorrhages | Anaemia | Conjunctivitis | Mastitis (Black udder) | Panic | Depression or sleepy sickness |
|-----|---------------------------------------------------|-----------------|----------|--------------|---------|----------------|------------------------|-------|-------------------------------|
|     |                                                   |                 |          |              |         |                |                        |       |                               |
|     |                                                   |                 |          |              |         |                |                        |       |                               |

|  |  |  |  |  |  |  |  |  |  |
|--|--|--|--|--|--|--|--|--|--|
|  |  |  |  |  |  |  |  |  |  |
|  |  |  |  |  |  |  |  |  |  |

## 5.OTHERS DISEASES AND CONDITIONS

Please tell us, how serious you consider each of problems that there are in your animals.

| Diseases/syndromes                         | Serious problem | Moderate problem | Present but no problem | Non-existent |
|--------------------------------------------|-----------------|------------------|------------------------|--------------|
| Infertility                                |                 |                  |                        |              |
| Bearing troubles<br>(Prolapse of vagina)   |                 |                  |                        |              |
| Lambing difficulties                       |                 |                  |                        |              |
| Mastitis (Black udder)                     |                 |                  |                        |              |
| Diarrhea in lambs                          |                 |                  |                        |              |
| Arthritis in lambs                         |                 |                  |                        |              |
| Lamb deaths during first two weeks of life |                 |                  |                        |              |
| Facial eczema                              |                 |                  |                        |              |
| Pneumonia                                  |                 |                  |                        |              |
| Salmonellosis (Diarrhea)                   |                 |                  |                        |              |
| Pinkeye                                    |                 |                  |                        |              |
| Pregnancy toxemia                          |                 |                  |                        |              |
