# Supplementary material for: Modelling the Unidentified Abortion Burden from Four Infectious Pathogenic Microorganisms (Leptospira interrogans, Brucella abortus, Brucella ovis, and Chlamydia abortus) in Ewes Based on Artificial Neural Networks Approach: The Epidemiological Basis for a Control Policy
Source: Animals (Basel). 2023 Sep 18;13(18):2955. doi: 10.3390/ani13182955 (PMC10525082; doi:10.3390/ani13182955)
Supplement: Supplementary file 1 [file animals-13-02955-s001.zip]

Archive with 5 entries (5 files):
- Figure S1.pdf
- Table S1_Animals.xlsx
- Table S2_Animals.pdf
- Table S3_Animals.pdf
- Table S4_Animals.pdf
