# Supplementary material for: Modelling the Unidentified Abortion Burden from Four Infectious Pathogenic Microorganisms (Leptospira interrogans, Brucella abortus, Brucella ovis, and Chlamydia abortus) in Ewes Based on Artificial Neural Networks Approach: The Epidemiological Basis for a Control Policy
Source: Animals (Basel). 2023 Sep 18;13(18):2955. doi: 10.3390/ani13182955 (PMC10525082; doi:10.3390/ani13182955)
Supplement: Supplementary file 1 [file animals-13-02955-s001.zip › Table S1_Animals.xlsx]

## Sheet: Hoja1
Table S1. Climatic and environmental data from study area.
Site,N,10,0	Lat,N,24,15	Long,N,24,15	Alt,N,24,15	Max Temp	Min Temp	Reference Max Temp	Reference Min Temp	AREA,N,19,11	PERIMETER,N,19,11	COV_,N,11,0	COV_ID,N,11,0	CVE_CONCA,C,254	CVE_ENT,C,254	CVE_MUN,C,254	Name of Municipality_MUN,C,254	City,C,100	NOM_ENT,C,100	Reference of information on municipalities (columns F - N)	Coordinates and altitude of municipality	Province	Sub-province	Temp range	Precip range	Climate	Source of information of municipalities (columns P - V)
1	19.3114	-99.4397	2735.09	DE 26 A 28	DE -2 A 0	García, E. - CONABIO, (1998). 'Absolute Max Temp'. Sacle 1:1000000. México.	García, E. - CONABIO, (1998). 'Absolute Min Temp'. Scale 1:1000000. México.	2.11591e+08	90453.5	1559	1558	15051	15	051	Lerma	Toluca de Lerdo	State of México	INEGI, (2010). 'División Municipal de México, 2005', escala: 1:250000. Instituto Nacional de Estadística y Geografía. México.	19° 14’ and 19° 26’ N Lat; 99° 22’ and 99° 34’ W long; 2 500 and 3 500 masl	Transvolcanic Belt (100%)	Anahuac volcanoes and lakes (100%)	8 – 14°C	800 – 1 300 mm	Temperate subhumid with summer precipitations, and winter showing low precipitations.	https://www.inegi.org.mx/contenidos/app/mexicocifras/datos_geograficos/15/15051.pdf
2	19.2847	-99.4428	2731.2	DE 26 A 28	DE -4 A -2	García, E. - CONABIO, (1998). 'Absolute Max Temp'. Scale 1:1000000. México.	García, E. - CONABIO, (1998). 'Absolute Min Temp'. Scale 1:1000000. México.	1.33961e+08	67295.2	1631	1630	15062	15	062	Ocoyoacac	Toluca de Lerdo	State of México	INEGI, (2010). 'División Municipal de México, 2005', escala: 1:250000. Instituto Nacional de Estadística y Geografía. México.	19° 12’ and 19° 18’ N Lat; 99° 18’ and 99° 30’ W Long; 2 500 and 3 900 masl	Transvolcanic Belt (100%)	Anahuac volcanoes and lakes (100%)	6 – 14°C	800 – 2 000 mm	Temperate subhumid with summer precipitations, and winter showing low precipitations.	https://www.inegi.org.mx/contenidos/app/mexicocifras/datos_geograficos/15/15062.pdf
3	19.275	-99.4864	2735	DE 26 A 28	DE -4 A -2	García, E. - CONABIO, (1998). 'Absloute Max temp'. Scale 1:1000000. México.	García, E. - CONABIO, (1998). 'Absolute Min Temp'. Scale 1:1000000. México.	1.33961e+08	67295.2	1631	1630	15062	15	062	Ocoyoacac	Toluca de Lerdo	State of México	INEGI, (2010). 'División Municipal de México, 2005', escala: 1:250000. Instituto Nacional de Estadística y Geografía. México.	19° 12’ and 19° 18’ N Lat; 99° 18’ and 99° 30’ W Long; 2 500 and 3 900 masl	Transvolcanic Belt (100%)	Anahuac volcanoes and lakes (100%)	6 – 14°C	800 – 2 000 mm	Temperate subhumid with summer precipitations, and winter showing low precipitations.	https://www.inegi.org.mx/contenidos/app/mexicocifras/datos_geograficos/15/15062.pdf
4	19.2483	-99.4542	2735.22	DE 26 A 28	DE -4 A -2	García, E. - CONABIO, (1998). 'Absloute Max temp'. Scale 1:1000000. México.	García, E. - CONABIO, (1998). 'Absolute Min Temp'. Scale 1:1000000. México.	1.33961e+08	67295.2	1631	1630	15062	15	062	Ocoyoacac	Toluca de Lerdo	State of México	INEGI, (2010). 'División Municipal de México, 2005', escala: 1:250000. Instituto Nacional de Estadística y Geografía. México.	19° 12’ and 19° 18’ N Lat; 99° 18’ and 99° 30’ W Long; 2 500 and 3 900 masl	Transvolcanic Belt (100%)	Anahuac volcanoes and lakes (100%)	6 – 14°C	800 – 2 000 mm	Temperate subhumid with summer precipitations, and winter showing low precipitations.	https://www.inegi.org.mx/contenidos/app/mexicocifras/datos_geograficos/15/15062.pdf
5	19.2386	-99.4814	2866	DE 28 A 30	DE -4 A -2	García, E. - CONABIO, (1998). 'Absloute Max temp'. Scale 1:1000000. México.	García, E. - CONABIO, (1998). 'Absolute Min Temp'. Scale 1:1000000. México.	2.11591e+08	90453.5	1559	1558	15051	15	051	Lerma	Toluca de Lerdo	State of México	INEGI, (2010). 'División Municipal de México, 2005', escala: 1:250000. Instituto Nacional de Estadística y Geografía. México.	19° 14’ and 19° 26’ N Lat; 99° 22’ and 99° 34’ W Long; 2 500 and 3 500 masl	Transvolcanic Belt (100%)	Anahuac volcanoes and lakes (100%)	8 – 14°C	800 – 1 300 mm	Temperate subhumid with summer precipitations, and winter showing low precipitations.	https://www.inegi.org.mx/contenidos/app/mexicocifras/datos_geograficos/15/15051.pdf
6	19.2377	-99.4811	2572	DE 28 A 30	DE -4 A -2	García, E. - CONABIO, (1998). 'Absloute Max temp'. Scale 1:1000000. México.	García, E. - CONABIO, (1998). 'Absolute Min Temp'. Scale 1:1000000. México.	2.11591e+08	90453.5	1559	1558	15051	15	051	Lerma	Toluca de Lerdo	State of México	INEGI, (2010). 'División Municipal de México, 2005', escala: 1:250000. Instituto Nacional de Estadística y Geografía. México.	19° 14’ and 19° 26’ N Lat; 99° 22’ and 99° 34’ W Long; 2 500 and 3 500 masl	Transvolcanic Belt (100%)	Anahuac volcanoes and lakes (100%)	8 – 14°C	800 – 1 300 mm	Temperate subhumid with summer precipitations, and winter showing low precipitations.	https://www.inegi.org.mx/contenidos/app/mexicocifras/datos_geograficos/15/15051.pdf
7	19.2377	-99.4783	2574	DE 28 A 30	DE -4 A -2	García, E. - CONABIO, (1998). 'Absloute Max temp'. Scale 1:1000000. México.	García, E. - CONABIO, (1998). 'Absolute Min Temp'. Scale 1:1000000. México.	2.11591e+08	90453.5	1559	1558	15051	15	051	Lerma	Toluca de Lerdo	State of México	INEGI, (2010). 'División Municipal de México, 2005', escala: 1:250000. Instituto Nacional de Estadística y Geografía. México.	Entre los paralelos 19° 14’ y 19° 26’ de latitud norte; los meridianos 99° 22’ y 99° 34’ de longitud oeste; altitud entre 2 500 y 3 500 m	Transvolcanic Belt (100%)	Anahuac volcanoes and lakes (100%)	8 – 14°C	800 – 1 300 mm	Temperate subhumid with summer precipitations, and winter showing low precipitations.	https://www.inegi.org.mx/contenidos/app/mexicocifras/datos_geograficos/15/15051.pdf
8	19.2217	-99.4561	2735.05	DE 26 A 28	DE -4 A -2	García, E. - CONABIO, (1998). 'Absloute Max temp'. Scale 1:1000000. México.	García, E. - CONABIO, (1998). 'Absolute Min Temp'. Scale 1:1000000. México.	3.20742e+07	40232.7	1678	1677	15019	15	019	Capulhuac	Toluca de Lerdo	State of México	INEGI, (2010). 'División Municipal de México, 2005', escala: 1:250000. Instituto Nacional de Estadística y Geografía. México.	19° 10’ and 19° 15’N Lat; 99° 24’and 99° 31’ W Long; 2500 and 3000 masl	Transvolcanic Belt (100%)	Anahuac volcanoes and lakes (100%)	10–14°C	800 –1 100mm	Temperate subhumid with summer precipitations, and winter showing low precipitations.	https://docplayer.es/96059414-Prontuario-de-informacion-geografica-municipal-de-los-estados-unidos-mexicanos-capulhuac-mexico-clave-geoestadistica-15019.html
9	19.2003	-99.5225	2574.32	DE 28 A 30	DE -4 A -2	García, E. - CONABIO, (1998). 'Absloute Max temp'. Scale 1:1000000. México.	García, E. - CONABIO, (1998). 'Absolute Min Temp'. Scale 1:1000000. México.	1.67078e+08	111142	1697	1696	15101	15	101	Tianguistenco	Toluca de Lerdo	State of México	INEGI, (2010). 'División Municipal de México, 2005', escala: 1:250000. Instituto Nacional de Estadística y Geografía. México.	19°04´ and 19°14´ N Long; 99°17´and 99°32´W Long; 2 500 and 3 800 masl	Transvolcanic Belt (100%)	Anahuac volcanoes and lakes (100%)	6 – 14°C	800 – 2 000 mm	Temperate subhumid with summer precipitations, and winter showing low precipitations.	https://www.inegi.org.mx/contenidos/app/mexicocifras/datos_geograficos/15/15101.pdf
10	19.2006	-99.5225	2574.27	DE 28 A 30	DE -4 A -2	García, E. - CONABIO, (1998). 'Absloute Max temp'. Scale 1:1000000. México.	García, E. - CONABIO, (1998). 'Absolute Min Temp'. Scale 1:1000000. México.	1.67078e+08	111142	1697	1696	15101	15	101	Tianguistenco	Toluca de Lerdo	State of México	INEGI, (2010). 'División Municipal de México, 2005', escala: 1:250000. Instituto Nacional de Estadística y Geografía. México.	Entre los paralelos 19°04´ y 19°14´ de latitud norte; los meridianos 99°17´y 99°32´de longitud oeste; altitud entre 2 500 y 3 800 m	Transvolcanic Belt (100%)	Anahuac volcanoes and lakes (100%)	6 – 14°C	800 – 2 000 mm	Temperate subhumid with summer precipitations, and winter showing low precipitations.	https://www.inegi.org.mx/contenidos/app/mexicocifras/datos_geograficos/15/15101.pdf
11	19.2008	-99.5225	2574.26	DE 28 A 30	DE -4 A -2	García, E. - CONABIO, (1998). 'Absloute Max temp'. Scale 1:1000000. México.	García, E. - CONABIO, (1998). 'Absolute Min Temp'. Scale 1:1000000. México.	1.67078e+08	111142	1697	1696	15101	15	101	Tianguistenco	Toluca de Lerdo	State of México	INEGI, (2010). 'División Municipal de México, 2005', escala: 1:250000. Instituto Nacional de Estadística y Geografía. México.	19°04´ and 19°14´ N Lat; 99°17´and 99°32´W Long; 2 500 and 3 800 masl	Transvolcanic Belt (100%)	Anahuac volcanoes and lakes (100%)	6 – 14°C	800 – 2 000 mm	Temperate subhumid with summer precipitations, and winter showing low precipitations.	https://www.inegi.org.mx/contenidos/app/mexicocifras/datos_geograficos/15/15101.pdf
12	19.2011	-99.5225	2574.24	DE 28 A 30	DE -4 A -2	García, E. - CONABIO, (1998). 'Absloute Max temp'. Scale 1:1000000. México.	García, E. - CONABIO, (1998). 'Absolute Min Temp'. Scale 1:1000000. México.	1.67078e+08	111142	1697	1696	15101	15	101	Tianguistenco	Toluca de Lerdo	State of México	INEGI, (2010). 'División Municipal de México, 2005', escala: 1:250000. Instituto Nacional de Estadística y Geografía. México.	19°04´ and 19°14´ N Lat; 99°17´and 99°32´W Long; 2 500 and 3 800 masl	Transvolcanic Belt (100%)	Anahuac volcanoes and lakes (100%)	6 – 14°C	800 – 2 000 mm	Temperate subhumid with summer precipitations, and winter showing low precipitations.	https://www.inegi.org.mx/contenidos/app/mexicocifras/datos_geograficos/15/15101.pdf
13	19.2014	-99.5225	2574.26	DE 28 A 30	DE -4 A -2	García, E. - CONABIO, (1998). 'Absloute Max temp'. Scale 1:1000000. México.	García, E. - CONABIO, (1998). 'Absolute Min Temp'. Scale 1:1000000. México.	1.67078e+08	111142	1697	1696	15101	15	101	Tianguistenco	Toluca de Lerdo	State of México	INEGI, (2010). 'División Municipal de México, 2005', escala: 1:250000. Instituto Nacional de Estadística y Geografía. México.	19°04´ and 19°14´ N Lat; 99°17´and 99°32´W Long; 2 500 and 3 800 masl	Transvolcanic Belt (100%)	Anahuac volcanoes and lakes (100%)	6 – 14°C	800 – 2 000 mm	Temperate subhumid with summer precipitations, and winter showing low precipitations.	https://www.inegi.org.mx/contenidos/app/mexicocifras/datos_geograficos/15/15101.pdf
14	19.2017	-99.5225	2574.27	DE 28 A 30	DE -4 A -2	García, E. - CONABIO, (1998). 'Absloute Max temp'. Scale 1:1000000. México.	García, E. - CONABIO, (1998). 'Absolute Min Temp'. Scale 1:1000000. México.	1.67078e+08	111142	1697	1696	15101	15	101	Tianguistenco	Toluca de Lerdo	State of México	INEGI, (2010). 'División Municipal de México, 2005', escala: 1:250000. Instituto Nacional de Estadística y Geografía. México.	19°04´ and 19°14´ N Lat; 99°17´and 99°32´W Long; 2 500 and 3 800 masl	Transvolcanic Belt (100%)	Anahuac volcanoes and lakes (100%)	6 – 14°C	800 – 2 000 mm	Temperate subhumid with summer precipitations, and winter showing low precipitations.	https://www.inegi.org.mx/contenidos/app/mexicocifras/datos_geograficos/15/15101.pdf
15	19.2028	-99.43	2735.12	DE 26 A 28	DE -4 A -2	García, E. - CONABIO, (1998). 'Absloute Max temp'. Scale 1:1000000. México.	García, E. - CONABIO, (1998). 'Absolute Min Temp'. Scale 1:1000000. México.	1.67078e+08	111142	1697	1696	15101	15	101	Tianguistenco	Toluca de Lerdo	State of México	INEGI, (2010). 'División Municipal de México, 2005', escala: 1:250000. Instituto Nacional de Estadística y Geografía. México.	19°04´ and 19°14´ N Lat; 99°17´and 99°32´W Long; 2 500 and 3 800 masl	Transvolcanic Belt (100%)	Anahuac volcanoes and lakes (100%)	6 – 14°C	800 – 2 000 mm	Temperate subhumid with summer precipitations, and winter showing low precipitations.	https://www.inegi.org.mx/contenidos/app/mexicocifras/datos_geograficos/15/15101.pdf
16	19.2072	-99.4717	2735.1	DE 28 A 30	DE -4 A -2	García, E. - CONABIO, (1998). 'Absloute Max temp'. Scale 1:1000000. México.	García, E. - CONABIO, (1998). 'Absolute Min Temp'. Scale 1:1000000. México.	3.20742e+07	40232.7	1678	1677	15019	15	019	Capulhuac	Toluca de Lerdo	State of México	INEGI, (2010). 'División Municipal de México, 2005', escala: 1:250000. Instituto Nacional de Estadística y Geografía. México.	19° 10’ and 19° 15’N Lat; 99° 24’ and 99° 31’ W Long; 2500 and 3000 masl	Transvolcanic Belt (100%)	Anahuac volcanoes and lakes (100%)	10–14°C	800 –1 100mm	Temperate subhumid with summer precipitations, and winter showing low precipitations.	https://docplayer.es/96059414-Prontuario-de-informacion-geografica-municipal-de-los-estados-unidos-mexicanos-capulhuac-mexico-clave-geoestadistica-15019.html
17	19.2031	-99.5258	2575.12	DE 28 A 30	DE -4 A -2	García, E. - CONABIO, (1998). 'Absloute Max temp'. Scale 1:1000000. México.	García, E. - CONABIO, (1998). 'Absolute Min Temp'. Scale 1:1000000. México.	1.67078e+08	111142	1697	1696	15101	15	101	Tianguistenco	Toluca de Lerdo	State of México	INEGI, (2010). 'División Municipal de México, 2005', escala: 1:250000. Instituto Nacional de Estadística y Geografía. México.	19°04´ and 19°14´ N Lat; 99°17´and 99°32´ W Long; 2 500 and 3 800 masl	Transvolcanic Belt (100%)	Anahuac volcanoes and lakes (100%)	6 – 14°C	800 – 2 000 mm	Temperate subhumid with summer precipitations, and winter showing low precipitations.	https://www.inegi.org.mx/contenidos/app/mexicocifras/datos_geograficos/15/15101.pdf
18	19.2033	-99.5269	2575.16	DE 28 A 30	DE -4 A -2	García, E. - CONABIO, (1998). 'Absloute Max temp'. Scale 1:1000000. México.	García, E. - CONABIO, (1998). 'Absolute Min Temp'. Scale 1:1000000. México.	1.67078e+08	111142	1697	1696	15101	15	101	Tianguistenco	Toluca de Lerdo	State of México	INEGI, (2010). 'División Municipal de México, 2005', escala: 1:250000. Instituto Nacional de Estadística y Geografía. México.	19°04´ and 19°14´ N Lat; 99°17´and 99°32´ W Long; 2 500 and 3 800 masl	Transvolcanic Belt (100%)	Anahuac volcanoes and lakes (100%)	6 – 14°C	800 – 2 000 mm	Temperate subhumid with summer precipitations, and winter showing low precipitations.	https://www.inegi.org.mx/contenidos/app/mexicocifras/datos_geograficos/15/15101.pdf
19	19.2036	-99.5269	2575.11	DE 28 A 30	DE -4 A -2	García, E. - CONABIO, (1998). 'Absloute Max temp'. Scale 1:1000000. México.	García, E. - CONABIO, (1998). 'Absolute Min Temp'. Scale 1:1000000. México.	1.67078e+08	111142	1697	1696	15101	15	101	Tianguistenco	Toluca de Lerdo	State of México	INEGI, (2010). 'División Municipal de México, 2005', escala: 1:250000. Instituto Nacional de Estadística y Geografía. México.	19°04´ and 19°14´ N Lat; 99°17´and 99°32´ W Long; 2 500 and 3 800 masl	Transvolcanic Belt (100%)	Anahuac volcanoes and lakes (100%)	6 – 14°C	800 – 2 000 mm	Temperate subhumid with summer precipitations, and winter showing low precipitations.	https://www.inegi.org.mx/contenidos/app/mexicocifras/datos_geograficos/15/15101.pdf
20	19.1986	-99.5225	2574.31	DE 28 A 30	DE -4 A -2	García, E. - CONABIO, (1998). 'Absloute Max temp'. Scale 1:1000000. México.	García, E. - CONABIO, (1998). 'Absolute Min Temp'. Scale 1:1000000. México.	1.67078e+08	111142	1697	1696	15101	15	101	Tianguistenco	Toluca de Lerdo	State of México	INEGI, (2010). 'División Municipal de México, 2005', escala: 1:250000. Instituto Nacional de Estadística y Geografía. México.	19°04´ and 19°14´ N Lat; 99°17´and 99°32´ W Long; 2 500 and 3 800 masl	Transvolcanic Belt (100%)	Anahuac volcanoes and lakes (100%)	6 – 14°C	800 – 2 000 mm	Temperate subhumid with summer precipitations, and winter showing low precipitations.	https://www.inegi.org.mx/contenidos/app/mexicocifras/datos_geograficos/15/15101.pdf
21	19.1989	-99.5225	2574.34	DE 28 A 30	DE -4 A -2	García, E. - CONABIO, (1998). 'Temperatura máxima absoluta'. Escala 1:1000000. México.	García, E. - CONABIO, (1998). 'Absolute Min Temp'. Scale 1:1000000. México.	1.67078e+08	111142	1697	1696	15101	15	101	Tianguistenco	Toluca de Lerdo	State of México	INEGI, (2010). 'División Municipal de México, 2005', escala: 1:250000. Instituto Nacional de Estadística y Geografía. México.	19°04´ and 19°14´ N lat; 99°17´and 99°32´ W Long; 2 500 and 3 800 masl	Transvolcanic Belt (100%)	Anahuac volcanoes and lakes (100%)	6 – 14°C	800 – 2 000 mm	Temperate subhumid with summer precipitations, and winter showing low precipitations.	https://www.inegi.org.mx/contenidos/app/mexicocifras/datos_geograficos/15/15101.pdf
22	19.1797	-99.4069	2817	DE 26 A 28	DE -4 A -2	García, E. - CONABIO, (1998). 'Temperatura máxima absoluta'. Escala 1:1000000. México.	García, E. - CONABIO, (1998). 'Absolute Min Temp'. Scale 1:1000000. México.	1.15846e+08	49805.7	1699	1698	15043	15	043	Xalatlaco	Toluca de Lerdo	State of México	INEGI, (2010). 'División Municipal de México, 2005', escala: 1:250000. Instituto Nacional de Estadística y Geografía. México.	19° 08’ and 19° 14’ N Lat; 99° 16’ and 99° 28’ W Long; 2 600 and 3 800 masl.	Transvolcanic Belt (100%)	Anahuac volcanoes and lakes (100%)	6 – 14°C	1 100 – 2 000 mm	Temperate subhumid with summer precipitations, and winter showing low precipitations.	https://xalatlaco.edomex.gob.mx/sites/xalatlaco.edomex.gob.mx/files/files/INEGI/Compendio%20de%20Inf%20Mpal%20Xalatlaco%202020.pdf
23	19.1486	-99.4169	2827	DE 26 A 28	DE -6 A -4	García, E. - CONABIO, (1998). 'Temperatura máxima absoluta'. Escala 1:1000000. México.	García, E. - CONABIO, (1998). 'Absolute Min Temp'. Scale 1:1000000. México.	1.15846e+08	49805.7	1699	1698	15043	15	043	Xalatlaco	Toluca de Lerdo	State of México	INEGI, (2010). 'División Municipal de México, 2005', escala: 1:250000. Instituto Nacional de Estadística y Geografía. México.	19° 08’ and 19° 14’ N Lat; 99° 16’ and 99° 28’ W Long; 2 600 and 3 800 masl.	Transvolcanic Belt (100%)	Anahuac volcanoes and lakes (100%)	6 – 14°C	1 100 – 2 000 mm	Temperate subhumid with summer precipitations, and winter showing low precipitations.	https://xalatlaco.edomex.gob.mx/sites/xalatlaco.edomex.gob.mx/files/files/INEGI/Compendio%20de%20Inf%20Mpal%20Xalatlaco%202020.pdf
24	19.1675	-99.4172	2811	DE 26 A 28	DE -4 A -2	García, E. - CONABIO, (1998). 'Absloute Max temp'. Scale 1:1000000. México.	García, E. - CONABIO, (1998). 'Absolute Min Temp'. Scale 1:1000000. México.	1.15846e+08	49805.7	1699	1698	15043	15	043	Xalatlaco	Toluca de Lerdo	State of México	INEGI, (2010). 'División Municipal de México, 2005', escala: 1:250000. Instituto Nacional de Estadística y Geografía. México.	19° 08’ and 19° 14’ N Lat; 99° 16’ and 99° 28’ W Long; 2 600 and 3 800 masl.	Transvolcanic Belt (100%)	Anahuac volcanoes and lakes (100%)	6 – 14°C	1 100 – 2 000 mm	Temperate subhumid with summer precipitations, and winter showing low precipitations.	https://xalatlaco.edomex.gob.mx/sites/xalatlaco.edomex.gob.mx/files/files/INEGI/Compendio%20de%20Inf%20Mpal%20Xalatlaco%202020.pdf
25	19.1669	-99.4189	2952	DE 26 A 28	DE -4 A -2	García, E. - CONABIO, (1998). 'Absloute Max temp'. Scale 1:1000000. México.	García, E. - CONABIO, (1998). 'Absolute Min Temp'. Scale 1:1000000. México.	1.15846e+08	49805.7	1699	1698	15043	15	043	Xalatlaco	Toluca de Lerdo	State of México	INEGI, (2010). 'División Municipal de México, 2005', escala: 1:250000. Instituto Nacional de Estadística y Geografía. México.	19° 08’ and 19° 14’ N Lat; 99° 16’ and 99° 28’ W Long; 2 600 and 3 800 masl.	Transvolcanic Belt (100%)	Anahuac volcanoes and lakes (100%)	6 – 14°C	1 100 – 2 000 mm	Temperate subhumid with summer precipitations, and winter showing low precipitations.	https://xalatlaco.edomex.gob.mx/sites/xalatlaco.edomex.gob.mx/files/files/INEGI/Compendio%20de%20Inf%20Mpal%20Xalatlaco%202020.pdf
26	19.1633	-99.3836	2995	DE 26 A 28	DE -6 A -4	García, E. - CONABIO, (1998). 'Absloute Max temp'. Scale 1:1000000. México.	García, E. - CONABIO, (1998). 'Absolute Min Temp'. Scale 1:1000000. México.	1.15846e+08	49805.7	1699	1698	15043	15	043	Xalatlaco	Toluca de Lerdo	State of México	INEGI, (2010). 'División Municipal de México, 2005', escala: 1:250000. Instituto Nacional de Estadística y Geografía. México.	19° 08’ and 19° 14’ N Lat; 99° 16’ and 99° 28’ W Long; 2 600 and 3 800 masl.	Transvolcanic Belt (100%)	Anahuac volcanoes and lakes (100%)	6 – 14°C	1 100 – 2 000 mm	Temperate subhumid with summer precipitations, and winter showing low precipitations.	https://xalatlaco.edomex.gob.mx/sites/xalatlaco.edomex.gob.mx/files/files/INEGI/Compendio%20de%20Inf%20Mpal%20Xalatlaco%202020.pdf
27	19.1611	-99.4042	2831	DE 26 A 28	DE -4 A -2	García, E. - CONABIO, (1998). 'Absloute Max temp'. Scale 1:1000000. México.	García, E. - CONABIO, (1998). 'Absolute Min Temp'. Scale 1:1000000. México.	1.15846e+08	49805.7	1699	1698	15043	15	043	Xalatlaco	Toluca de Lerdo	State of México	INEGI, (2010). 'División Municipal de México, 2005', escala: 1:250000. Instituto Nacional de Estadística y Geografía. México.	19° 08’ and 19° 14’ N Lat; 99° 16’ and 99° 28’ W Long; 2 600 and 3 800 masl.	Transvolcanic Belt (100%)	Anahuac volcanoes and lakes (100%)	6 – 14°C	1 100 – 2 000 mm	Temperate subhumid with summer precipitations, and winter showing low precipitations.	https://xalatlaco.edomex.gob.mx/sites/xalatlaco.edomex.gob.mx/files/files/INEGI/Compendio%20de%20Inf%20Mpal%20Xalatlaco%202020.pdf
28	19.1556	-99.4075	2829	DE 26 A 28	DE -4 A -2	García, E. - CONABIO, (1998). 'Absloute Max temp'. Scale 1:1000000. México.	García, E. - CONABIO, (1998). 'Absolute Min Temp'. Scale 1:1000000. México.	1.15846e+08	49805.7	1699	1698	15043	15	043	Xalatlaco	Toluca de Lerdo	State of México	INEGI, (2010). 'División Municipal de México, 2005', escala: 1:250000. Instituto Nacional de Estadística y Geografía. México.	19° 08’ and 19° 14’ N Lat; 99° 16’ and 99° 28’ W Long; 2 600 and 3 800 masl.	Transvolcanic Belt (100%)	Anahuac volcanoes and lakes (100%)	6 – 14°C	1 100 – 2 000 mm	Temperate subhumid with summer precipitations, and winter showing low precipitations.	https://xalatlaco.edomex.gob.mx/sites/xalatlaco.edomex.gob.mx/files/files/INEGI/Compendio%20de%20Inf%20Mpal%20Xalatlaco%202020.pdf
29	19.1367	-99.5156	2574.3	DE 26 A 28	DE -8 A -6	García, E. - CONABIO, (1998). 'Absloute Max temp'. Scale 1:1000000. México.	García, E. - CONABIO, (1998). 'Absolute Min Temp'. Scale 1:1000000. México.	2.46513e+07	23208.2	1734	1733	15098	15	098	Texcalyacac	Toluca de Lerdo	State of México	INEGI, (2010). 'División Municipal de México, 2005', escala: 1:250000. Instituto Nacional de Estadística y Geografía. México.	19°05´ and 19°10´ N Lat; 99°29´and 99°32´ W Long; 2 500 and 3 100 masl	Transvolcanic Belt (100%)	Anahuac volcanoes and lakes (100%)	6 – 14°C	800 – 1 100 mm	Temperate subhumid with summer precipitations, and winter showing low precipitations.	https://texcalyacac.edomex.gob.mx/
30	19.1369	-99.5156	2574.3	DE 26 A 28	DE -8 A -6	García, E. - CONABIO, (1998). 'Absloute Max temp'. Scale 1:1000000. México.	García, E. - CONABIO, (1998). 'Absolute Min Temp'. Scale 1:1000000. México.	2.46513e+07	23208.2	1734	1733	15098	15	098	Texcalyacac	Toluca de Lerdo	State of México	INEGI, (2010). 'División Municipal de México, 2005', escala: 1:250000. Instituto Nacional de Estadística y Geografía. México.	19°05´ and 19°10´ N Lat; 99°29´ and 99°32´ W Long; 2 500 and 3 100 masl	Transvolcanic Belt (100%)	Anahuac volcanoes and lakes (100%)	6 – 14°C	800 – 1 100 mm	Temperate subhumid with summer precipitations, and winter showing low precipitations.	https://texcalyacac.edomex.gob.mx/
31	19.1372	-99.5161	2574.29	DE 26 A 28	DE -8 A -6	García, E. - CONABIO, (1998). 'Absloute Max temp'. Scale 1:1000000. México.	García, E. - CONABIO, (1998). 'Absolute Min Temp'. Scale 1:1000000. México.	2.46513e+07	23208.2	1734	1733	15098	15	098	Texcalyacac	Toluca de Lerdo	State of México	INEGI, (2010). 'División Municipal de México, 2005', escala: 1:250000. Instituto Nacional de Estadística y Geografía. México.	19°05´ and 19°10´ N Lat; 99°29´and 99°32´W Long; 2 500 and 3 100 masl	Transvolcanic Belt (100%)	Anahuac volcanoes and lakes (100%)	6 – 14°C	800 – 1 100 mm	Temperate subhumid with summer precipitations, and winter showing low precipitations.	https://texcalyacac.edomex.gob.mx/
32	19.14	-99.5183	2574.29	DE 26 A 28	DE -8 A -6	García, E. - CONABIO, (1998). 'Absloute Max temp'. Scale 1:1000000. México.	García, E. - CONABIO, (1998). 'Absolute Min Temp'. Scale 1:1000000. México.	2.46513e+07	23208.2	1734	1733	15098	15	098	Texcalyacac	Toluca de Lerdo	State of México	INEGI, (2010). 'División Municipal de México, 2005', escala: 1:250000. Instituto Nacional de Estadística y Geografía. México.	19°05´ and 19°10´ N Lat; 99°29´and 99°32´ W Long; 2 500 and 3 100 masl	Transvolcanic Belt (100%)	Anahuac volcanoes and lakes (100%)	6 – 14°C	800 – 1 100 mm	Temperate subhumid with summer precipitations, and winter showing low precipitations.	https://texcalyacac.edomex.gob.mx/
33	19.1408	-99.5236	2574.29	DE 26 A 28	DE -8 A -6	García, E. - CONABIO, (1998). 'Temperatura máxima absoluta'. Escala 1:1000000. México.	García, E. - CONABIO, (1998). 'Absolute Min Temp'. Scale 1:1000000. México.	2.46513e+07	23208.2	1734	1733	15098	15	098	Texcalyacac	Toluca de Lerdo	State of México	INEGI, (2010). 'División Municipal de México, 2005', escala: 1:250000. Instituto Nacional de Estadística y Geografía. México.	19°05´ and 19°10´ N Lat; 99°29´and 99°32´ W Long; 2 500 and 3 100 masl	Transvolcanic Belt (100%)	Anahuac volcanoes and lakes (100%)	6 – 14°C	800 – 1 100 mm	Temperate subhumid with summer precipitations, and winter showing low precipitations.	https://texcalyacac.edomex.gob.mx/
34	19.1414	-99.5133	2574.29	DE 26 A 28	DE -8 A -6	García, E. - CONABIO, (1998). 'Absloute Max temp'. Scale 1:1000000. México.	García, E. - CONABIO, (1998). 'Absolute Min Temp'. Scale 1:1000000. México.	2.46513e+07	23208.2	1734	1733	15098	15	098	Texcalyacac	Toluca de Lerdo	State of México	INEGI, (2010). 'División Municipal de México, 2005', escala: 1:250000. Instituto Nacional de Estadística y Geografía. México.	19°05´ and 19°10´ N Lat; 99°29´and 99°32´W Long; 2 500 and 3 100 masl	Transvolcanic Belt (100%)	Anahuac volcanoes and lakes (100%)	6 – 14°C	800 – 1 100 mm	Temperate subhumid with summer precipitations, and winter showing low precipitations.	https://texcalyacac.edomex.gob.mx/
35	19.1428	-99.5161	2574.29	DE 26 A 28	DE -8 A -6	García, E. - CONABIO, (1998). 'Absloute Max temp'. Scale 1:1000000. México.	García, E. - CONABIO, (1998). 'Absolute Min Temp'. Scale 1:1000000. México.	2.46513e+07	23208.2	1734	1733	15098	15	098	Texcalyacac	Toluca de Lerdo	State of México	INEGI, (2010). 'División Municipal de México, 2005', escala: 1:250000. Instituto Nacional de Estadística y Geografía. México.	19°05´ and 19°10´ N Lat; 99°29´and 99°32´W Long; 2 500 and 3 100 masl	Transvolcanic Belt (100%)	Anahuac volcanoes and lakes (100%)	6 – 14°C	800 – 1 100 mm	Temperate subhumid with summer precipitations, and winter showing low precipitations.	https://texcalyacac.edomex.gob.mx/
